# Supplementary material
Source: ML conference proceedings conference paper supplement (https://proceedings.neurips.cc/paper_files/paper/2022/hash/1968ea7d985aa377e3a610b05fc79be0-Abstract.html)
Supplement: Supplementary file 1 [file 1968ea7d985aa377e3a610b05fc79be0-Supplemental-Conference.zip]

Archive with 45 entries (43 files):
- Supplement/
- Supplement/.DS_Store
- __MACOSX/Supplement/._.DS_Store
- Supplement/example-survey-slides/
- __MACOSX/Supplement/._example-survey-slides
- Supplement/Appendix.pdf
- __MACOSX/Supplement/._Appendix.pdf
- Supplement/example-survey-slides/.DS_Store
- __MACOSX/Supplement/example-survey-slides/._.DS_Store
- Supplement/example-survey-slides/Survey_page-0.pdf
- __MACOSX/Supplement/example-survey-slides/._Survey_page-0.pdf
- Supplement/example-survey-slides/Survey_page-1.pdf
- __MACOSX/Supplement/example-survey-slides/._Survey_page-1.pdf
- Supplement/example-survey-slides/Survey_page-3.pdf
- __MACOSX/Supplement/example-survey-slides/._Survey_page-3.pdf
- Supplement/example-survey-slides/Survey_page-2.pdf
- __MACOSX/Supplement/example-survey-slides/._Survey_page-2.pdf
- Supplement/example-survey-slides/Survey_page-6.pdf
- __MACOSX/Supplement/example-survey-slides/._Survey_page-6.pdf
- Supplement/example-survey-slides/Survey_page-7.pdf
- __MACOSX/Supplement/example-survey-slides/._Survey_page-7.pdf
- Supplement/example-survey-slides/Survey_page-5.pdf
- __MACOSX/Supplement/example-survey-slides/._Survey_page-5.pdf
- Supplement/example-survey-slides/Survey_page-4.pdf
- __MACOSX/Supplement/example-survey-slides/._Survey_page-4.pdf
- Supplement/example-survey-slides/Survey_page-9.pdf
- __MACOSX/Supplement/example-survey-slides/._Survey_page-9.pdf
- Supplement/example-survey-slides/Survey_page-8.pdf
- __MACOSX/Supplement/example-survey-slides/._Survey_page-8.pdf
- Supplement/example-survey-slides/Survey_page-13.pdf
- __MACOSX/Supplement/example-survey-slides/._Survey_page-13.pdf
- Supplement/example-survey-slides/Survey_page-12.pdf
- __MACOSX/Supplement/example-survey-slides/._Survey_page-12.pdf
- Supplement/example-survey-slides/Survey_page-10.pdf
- __MACOSX/Supplement/example-survey-slides/._Survey_page-10.pdf
- Supplement/example-survey-slides/Survey_page-11.pdf
- __MACOSX/Supplement/example-survey-slides/._Survey_page-11.pdf
- Supplement/example-survey-slides/Survey_page-15.pdf
- __MACOSX/Supplement/example-survey-slides/._Survey_page-15.pdf
- Supplement/example-survey-slides/Survey_page-14.pdf
- __MACOSX/Supplement/example-survey-slides/._Survey_page-14.pdf
- Supplement/example-survey-slides/Survey_page-16.pdf
- __MACOSX/Supplement/example-survey-slides/._Survey_page-16.pdf
- Supplement/example-survey-slides/Survey_page-17.pdf
- __MACOSX/Supplement/example-survey-slides/._Survey_page-17.pdf
